# Supplementary material
Source: PubMed Central journal article supplement (PMC3127914)
Supplement: 1107272108_pnas.201107272SI.pdf [file 1107272108_pnas.201107272SI.pdf]

# Supporting Information

Espagne et al. 10.1073/pnas.1107272108

## SI Materials and Methods

**Cloning and Sequencing of *PaMe4* and *SME4* Genes.** The *PaMe4* gene, which corresponds to the original *Podospora mei4-1* mutant allele (1–3), was identified by positional cloning. Correct identity of the cloned gene was confirmed in two ways. First, the *PaMe4* gene of the *mei4-1* mutant was sequenced; it differs from the isogenic WT allele by a single base change from C to T, which results in a nonsense mutation at position R460 (CGA to TGA) and predicts a truncated protein containing one-third of the WT length. Second, an ectopic insertion of the WT *PaMe4* gene restores WT sporulation to the *mei4-1* mutant. A list of microsatellites or SNP markers used for the cloning is available on request. PCR amplifications were done according to procedures developed for the *Podospora anserina* genome assembly (4). Transformation of the *mei4-1* mutant strain, which produces only few viable ascospores, was performed with a *Podospora* cosmid genomic DNA library of strain *S* (10 µg DNA of each cosmid). Complementation (restoration of sporulation) was obtained with cosmid 11H11. To further narrow the complementing sequence, we used two plasmids, GA0AB219BF04 and GA0AB328AF06, obtained by the genome-sequencing project. After cotransformation along with pBC-Hyg into the *mei4-1* mutant strain, the Hygromycin B-resistant transformants were crossed to the *mei4-1* mutant strain of the appropriate mating type. Only the Hygromycin B-resistant transformants issued from the transformation performed with plasmid GA0AB219BF04 showed clear restoration of ascospores. Each of the three predicted ORFs of plasmid GA0AB219BF04 was tested separately (details on request). One showed full complementation of the sporulation defect of *mei4-1*.

*SME4* gene sequence (embl CABT01000092.1) was obtained from the *Sordaria macrospora* genome sequence (5) based on its sequence similarity with the *PaMe4* gene. The *SME4* DNA locus was sequenced de novo to correct the sequence, and the gene was reannotated manually using the cDNA sequence.

**Deletion of *PaMe4* and *SME4*.** To construct the  $\Delta pame4::hygR$  null allele, we amplified (by PCR) two 2-kb fragments corresponding to the 5' *PaMe4* flanking sequence and the 3' *PaMe4* flanking sequence using the pairs of primers  $\Delta pame1A$  (5'-aaAGAT-CTtcttctgttgcagatgg-3') and  $\Delta pame1B$  (5'-aagCGGCCGCacgggtttgttgcctcagctc-3') and  $\Delta pame2A$  (5'-aaTCTAGAcaccagactgcgatcagaaa-3') and  $\Delta pame2B$  (5'-aaAGATCTcgaagaatggaaagggtcaaa-3'), respectively, with *S*-strain genomic DNA as a template (details of PCR on request). The PCR amplified fragments were individually cloned into the pGEMT vector (Promega). The 2-kb 5' *PaMe4* flanking sequence was released from the pGEMT vector using *Bgl*II and *Not*I (underlined in  $\Delta pame1A$  and  $\Delta pame1B$  sequences). The 2-kb 3' *PaMe4* flanking sequence was released from the pGEMT vector using *Xba*I and *Bgl*II (underlined in  $\Delta pame2A$  and  $\Delta pame2B$  sequences). Both fragments were ligated to the pBC-hygro previously cleaved by *Not*I and *Xba*I. Transformation of the WT *S* strain was performed with 10 µg  $\Delta pame4::hygR$  plasmid previously linearized at the unique *Bgl*II site to generate homologous recombination ends. Two Hygromycin B-resistant clones showed the expected sporulation-deficient phenotype when further crossed with a *PaMe4-1* mutant strain of appropriate mating type. One of the sterile transformants was selected for additional studies. Correct gene replacement of the *PaMe4*<sup>+</sup> WT allele by the  $\Delta pame4::hygR$  mutant allele was verified by PCR and Southern blot analyses.

Mutant strains deleted for *SME4* were generated by gene substitution. The open-reading frame of *SME4* was replaced by the *Escherichia coli hph* gene conferring hygromycin resistance. The 5' and 3' flanking sequences were amplified using the following primers; for the 5' flanking sequence, *SME4*-promxbaI 5'-TGCTCTAGACGGGTATGAAAGAGGTATCACAG-3' and *SME4*-promhindIII 5'-CCCAAGCTTGTGGGCACCTAGAGGCAAC-3' primers were used, and for the 3' flanking sequence, *SME4*-delTnotI 5'-ATAAGAATGCGGCCGCGTATGTGGGTGATTTGTCGGAG-3' and *SME4*-delTxbaI 5'-TGCTCTAGAGTTACCTTTTCGGGAGTCTAGCAAC-3' were used. The 1,040-bp 3' flanking sequence PCR-amplified fragment displays an *Xba*I restriction site at the 3' end and a *Hind*III restriction site at the 5' end (underlined nucleotides in the primers). The 869-bp 5' flanking sequence PCR-amplified fragment displays a *Not*I restriction site in its 3' end and an *Xba*I restriction site in its 5' end (underlined nucleotides in the primers). Both fragments were ligated with the pBC-Hyg plasmid previously cleaved by *Hind*III and *Not*I. From this three-partner ligation experiment, we retrieved the  $\Delta Sme4::hygR$  plasmid harboring a complete deletion of the *SME4* protein coding sequence. The  $\Delta Sme4::hygR$  plasmid was linearized at the unique *Xba*I site to generate homologous recombination ends and was used for transformation of a *ku70* $\Delta$  mutant strain, which increases the homologous integration events. Transformants carrying a deleted allele were selected for hygromycin resistance and confirmed by PCR.

***SME4*-GFP Fusion.** The GFP coding sequence (p-EGFP-1; Clontech) was fused to *SME4* just after the last C-terminal amino acid predicted from the *SME4* ORF. The ORF is amplified using primers *SME4*-prompst (5'-AACTGCAGGTCCTTCCTTCTT) and *SME4*-termsmaI (5'-TCCCCGGGATTTGTTGTCAGGCGGAGGA). Both PCR product and p-EGFP-1 were cleaved by *Pst*I and *Sma*I and ligated using T4 DNA ligase (Fermentas). The GFP allele was ectopically integrated into a WT strain by cotransformation with pBC-nour. After selection for nourseothrycin resistance, transformants were screened for their expression of the *Sme4*-GFP fusion protein. *Sme4*-GFP was then introduced by genetic crosses into the *sme4* $\Delta$  strain. *Sme4*-GFP is fully functional: it complements all meiotic defects of *sme4* $\Delta$  and does not alter WT meiosis or sporulation. Thus, WT and *sme4* $\Delta$  strains carrying an ectopic copy of *Sme4*-GFP both produce 99% eight-spored asci, with 100% viable ascospores, like WT. Furthermore, the same pattern of *Sme4*-GFP localization is seen in both *sme4* $\Delta$  and WT backgrounds, implying that the fusion protein faithfully reports WT *Sme4* localization. No GFP immunostaining is detectable in strains lacking the GFP fusion proteins, implying complete specificity for the tagged molecules. Unfortunately, all efforts to express the GFP-tagged versions of *Podospora PaMe4* were unsuccessful.

**Recombination Frequency Assays of *Podospora*.** To associate the  $\Delta pame4::hygR$  allele with chromosome 1 from the *T*-strain genetic background, we crossed a  $\Delta pame4::hygR$  strain with the *PaMe4*<sup>+</sup> TS33 strain (Fig. S2). The TS33 strain is a haploid F1 offspring issued from a cross between *PaMe4*<sup>+</sup> *S* and *PaMe4*<sup>+</sup> *T* that harbors a chromosome 1 with *T* alleles for all of the 23 molecular markers tested (4). In the progeny of a  $\Delta pame4::hygR$  strain crossed with the TS33 strain, we then selected a homokaryotic strain carrying both the *PaMe4* deleted allele and a chromosome 1 showing *T* alleles only ( $\Delta pame4::hygR$  Chr1T) (Fig. S2). The same strategy was used to construct a strain harboring both the *PaMe4*

deleted allele and a chromosome 6 showing *T* alleles only ( $\Delta pame4::hygR$  Chr6T), except that the  $\Delta pame4::hygR$  strain was now crossed with the *PaMe4*<sup>+</sup> TS43 strain. Mycelia derived from ascospores collected from the crosses  $\Delta pame4::hygR$  Chr1T X  $\Delta pame4::hygR$  Chr1S and  $\Delta pame4::hygR$  Chr6T X  $\Delta pame4::hygR$  Chr6S were blended, and the resulting fragments were plated onto hygromycin-containing medium for regeneration. Among the regenerated mycelia, 62 were homokaryotic and therefore, formally haploid. PCR amplifications were performed according to the method used in ref. 4. Molecular markers were PCR-amplified with fluorescent primers (WellRED Oligos; Beckman Coulter) and analyzed using an automate sequencer (CEQ 8000; Beckman Coulter) according to the manufacturer's procedures.

## SI Results

**Phenotypes of *pame4* and *sme4* Null Alleles During the Vegetative Cycle.** In both organisms, the null mutation is recessive in heterozygous crosses. Furthermore, full complementation was found when the *Podospora PaMe4* gene was introduced into the *pame4* $\Delta$  strain and when the *Sordaria SME4* gene was introduced in the *sme4* $\Delta$  strain. Moreover, although *PaMe4* shows only 19% identity with the *Sordaria Sme4* protein, the *Sordaria WT SME4* gene restores an almost WT sporulation in the *Podospora pame4* $\Delta$  mutant (85% of four-spored asci in each perithecium), indicating corresponding functions. Correspondingly, the *PaMe4* gene restores sporulation in the *Sordaria sme4* $\Delta$  mutant.

- Marcou D (1979) Dominant enhancer effect of the meiotic *mei4* mutant on recombination frequencies restricted to linkage group VI in *Podospora anserina*. *Mol Gen Genet* 173:299–305.
- Marcou D, Masson A, Simonet JM, Piquepaille G (1979) Evidence for non-random spatial distribution of meiotic exchanges in *Podospora anserina*: Comparison between linkage groups 1 and 6. *Mol Gen Genet* 176:67–79.
- Simonet JM, Zickler D (1972) Mutations affecting meiosis in *Podospora anserina*. I. Cytological studies. *Chromosoma* 37:327–351.

Phylogenetic analyses reveal that the protein is well-conserved only among the Sordariales (e.g., *Podospora*, *Sordaria*, *Neurospora*, *Chaetomium*, *Sporotrichum*, and *Thielavia* species) (Fig. S1). Furthermore, the rather low percentage of identity found between Sordariales proteins (e.g., 19% between *Sme4* and *PaMe4* and 25% between *Neurospora crassa* NCU10217 and *PaMe4*) points to rapid evolution of the protein. NCU10217 and *Sme4* exhibit 60% identity, reflecting the overall proximity between *S. macrospora* and *N. crassa* (5).

Deletion mutant phenotypes show that *PaMe4* and *Sme4* are not of central importance for the vegetative cycle; *pame4* $\Delta$  and *sme4* $\Delta$  mutants exhibit vegetative growth rates (measured by mycelial growth per 12 h) that are very similar to WT *Podospora* and *Sordaria*, respectively. However, *pame4* $\Delta$  mutants do show a shortened life span. In WT *Podospora*, senescence appears after  $9.5 \pm 1.74$  cm growth in race tubes (expressed by an increase of the mycelial pigmentation and cellular death; reviewed in ref. 6); in *pame4* $\Delta$  mutant strains issued from the same cross, senescence appears earlier at  $6.0 \pm 2.58$  cm. Neither *Sordaria* WT nor *Sordaria sme4* $\Delta$  shows senescence. In contrast, both deletion mutants exhibit major defects during sporulation. In *Sordaria*, only 1.5% eight-spored asci are seen in the mutant fruiting bodies compared with 99% eight-spored asci seen in WT. Similar reduction to ~1.2% of WT-like asci is observed in *Podospora pame4* $\Delta$  homozygous crosses ( $n = 100$  and ~100 asci are in each fruiting body).

- Espagne E, et al. (2008) The genome sequence of the model ascomycete fungus *Podospora anserina*. *Genome Biol* 9:R77.
- Nowrousian M, et al. (2010) De novo assembly of a 40 Mb eukaryotic genome from short sequence reads: *Sordaria macrospora*, a model organism for fungal morphogenesis. *PLoS Genet* 6:e1000891.
- Jamet-Vierny C, Rossignol M, Haedens V, Silar P (1999) What triggers senescence in *Podospora anserina*? *Fungal Genet Biol* 27:26–35.

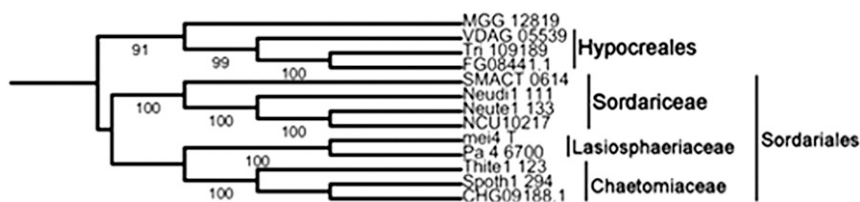

**Fig. S1.** Maximum likelihood phylogenetic tree of closely related *PaMe4/SME4* genes. Clear orthologs were found in the genomes of the following Sordariales: *Chaetomium globosum* (CHG09188.1), *Sporotrichum thermophile* (Spath1\_29412), *Thielavia terrestris* (Thite1\_123493), *Neurospora crassa* (NCU10217), *N. discreta* (Neudi1\_111487), and *N. tetrasperma* (Neute1\_133090). Potential orthologs are present in fungi more distantly related, such as *Magnaporthe grisea* (MGG\_12819), a Magnaporthaceae, and hypocrealean fungi, including *Fusarium graminearum* (FG08441.1) and *Trichoderma reesei* (Tri\_109189). The statistical support for actual orthology of *PaMe4* with putative orthologs of the latter fungi is low; however, positions of the two *P. anserina* introns are conserved in the *F. graminearum* ortholog, arguing for common origin.





Table S1. Comparison of Sme4 with the known SC TF proteins (1–9) and the SMC3 proteins of budding yeast and *Sordaria*

| Organism                    | Width of the SC central space (nm) | Entire molecule | Size (amino acids) |       |                          |               |        |               | $\pi$  |        |             |                 |                        |                        |
|-----------------------------|------------------------------------|-----------------|--------------------|-------|--------------------------|---------------|--------|---------------|--------|--------|-------------|-----------------|------------------------|------------------------|
|                             |                                    |                 | N end              | C end | $\alpha$ -Helical domain | Coiled coil 1 | Hinged | Coiled coil 2 | N end  | C end  | Coiled coil | Entire molecule | S/TPXX repeat in C end | S/TPXX repeat in N end |
| Zip1                        | 115                                | 875             | 184                | 126   | 565                      | 143           | 76     | 346           | 4, 69  | 10, 09 | 6, 05       | 6, 4            | 3; 0 = 3               | 1; 0 = 1               |
| <i>Arabidopsis thaliana</i> | 100–120                            | 871             | 42                 | 168   | 661                      | 532           | 102    | 27            | 10, 17 | 9, 85  | 5, 2        | 5, 84           | 1; 3 = 4               | 0; 0 = 0               |
| Zyp1a                       | 100–120                            | 856             | 42                 | 153   | 661                      | 532           | 102    | 27            | 9, 99  | 9, 3   | 5, 39       | 5, 9            | 1; 2 = 3               | 0; 0 = 0               |
| Zyp1b                       | 100–120                            | 869             | 57                 | 134   | 678                      | 546           | 57     | 75            | 10, 12 | 9, 64  | 5, 22       | 5, 88           | 2; 0 = 2               | 0; 0 = 0               |
| Zep1                        | 100                                | 976             | 123                | 199   | 674                      | 578           | 34     | 62            | 5, 86  | 9, 73  | 5, 29       | 5, 78           | 0; 5 = 5               | 0; 0 = 0               |
| SYCP1                       | 100                                | 946             | 58                 | 148   | 700                      | 605           | 44     | 51            | 4, 6   | 9, 85  | 5, 29       | 5, 56           | 1; 6 = 7               | 0; 0 = 0               |
| Sypc1                       | 100                                | 993             | 105                | 185   | 674                      | 578           | 34     | 62            | 5, 3   | 9, 78  | 5, 3        | 5, 69           | 1; 5 = 6               | 0; 0 = 0               |
| Sypc1                       | 100                                | 895             | 119                | 178   | 598                      | 58            | 64     | 476           | 7, 7   | 10, 2  | 5, 24       | 6, 18           | 2; 5 = 7               | 2; 0 = 2               |
| SCP1                        | 135                                | 1,000           | 112                | 188   | 700                      | 53            | 61     | 586           | 9, 41  | 10, 13 | 5, 32       | 6, 54           | 3; 0 = 3               | 1; 6 = 7               |
| XP684182                    | 135                                | 489             | 145                | 83    | 261                      | 132           | 51     | 78            | *      | *      | *           | *               |                        |                        |
| SYP-1                       | 90–125                             | 744             | 156                | 93    | 395                      | 395           | 0      | 0             | 9, 96  | 9, 73  | 4, 96       | 5, 92           | 0; 0 = 0               | 2; 1 = 3               |
| C(3)G                       | 109                                | 1,643           | 514                | 409   | 720                      | 214           | 125    | 381           | 9, 29  | 8, 79  | 5, 67       | 6, 63           | 2; 3 = 5               | 7; 4 = 11              |
| Sme4                        | 100                                | 1,503           | 411                | 394   | 698                      | 201           | 124    | 373           | 9, 65  | 9, 7   | 5, 18       | 6, 52           | 7; 6 = 13              | 9; 2 = 11              |
| Pame4                       | 100                                | 1,463           | 522                | 270   | 671                      | 215           | 168    | 288           | 9      | 8, 9   | 5, 82       | 6, 9            | 2; 2 = 4               | 6; 2 = 8               |
| Ncme4                       | 100                                | 1,230           | 176                | 187   | 867                      | 316           | 203    | 440           | 7, 95  | 4, 96  | 5, 64       | 5, 63           | 0; 0 = 0               | 1; 0 = 1               |
| SMC3                        |                                    | 1,199           | 176                | 187   | 836                      | 328           | 156    | 352           | 8, 75  | 4, 75  | 6, 05       | 6, 04           | 1; 0 = 1               | 0; 0 = 0               |
| SmsSMC3                     |                                    |                 |                    |       |                          |               |        |               |        |        |             |                 |                        |                        |

\*Probably not TF protein (4).

- Dong HJ, Roeder GS (2000) Organization of the yeast Zip1 protein within the central region of the synaptonemal complex. *J Cell Biol* 148:417–426.
- Higgins JD, Sanchez-Moran E, Armstrong SJ, Jones GH, Franklin FC (2005) The Arabidopsis synaptonemal complex protein ZYP1 is required for chromosome synapsis and normal fidelity of crossing over. *Genes Dev* 19:2488–2500.
- de Boer E, Heyting C (2006) The diverse roles of transverse filaments of synaptonemal complexes in meiosis. *Chromosoma* 115:220–234.
- Colaiacovo MP (2006) The many facets of SC function during *C. elegans* meiosis. *Chromosoma* 115:195–211.
- Iwai T, et al. (2006) Structural components of the synaptonemal complex, SYCP1 and SYCP3, in the medaka fish *Oryzias latipes*. *Exp Cell Res* 312:2528–2537.
- Jeffress JK, et al. (2007) The formation of the synaptonemal complex may occur by multiple mechanisms: The roles of the N- and C-terminal domains of the Drosophila C(3)G protein in mediating synapsis and recombination. *Genetics* 177:2445–2456.
- Page SL, et al. (2008) Corona is required for higher-order assembly of transverse filaments into full-length synaptonemal complex in *Drosophila* oocytes. *PLoS Genet* 4:e1000194.
- Bolcun-Filas E, et al. (2009) Mutation of the mouse Syce1 gene disrupts synapsis and suggests a link between synaptonemal complex structural components and DNA repair. *PLoS Genet* 5:e1000393.
- Wang M, et al. (2010) The central element protein ZEP1 of the synaptonemal complex regulates the number of crossovers during meiosis in rice. *Plant Cell* 22:417–430.
